# Supplementary material for: Detection of ALDH1 activity in rabbit hepatic VX2 tumors and isolation of ALDH1 positive cancer stem cells
Source: Springer Nature journal article supplement (doi:10.1186/s12967-016-0785-0), 2016-02-12

# FACSDiva Version 6.1.3

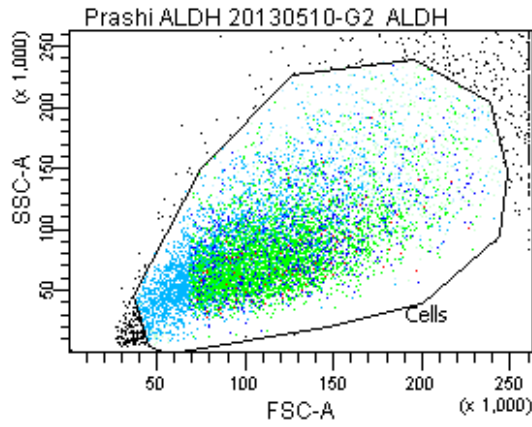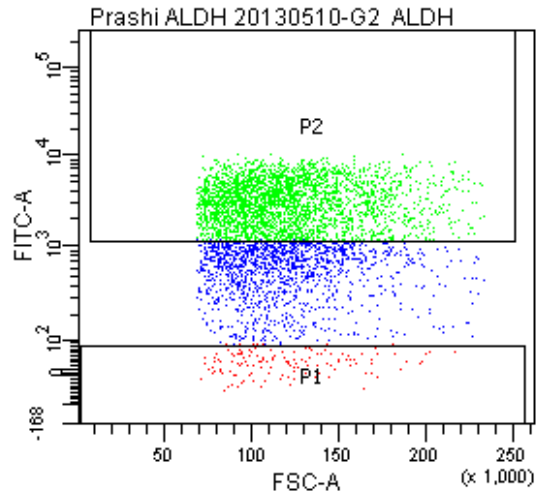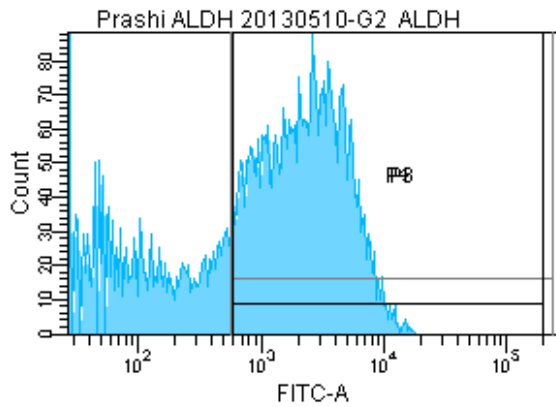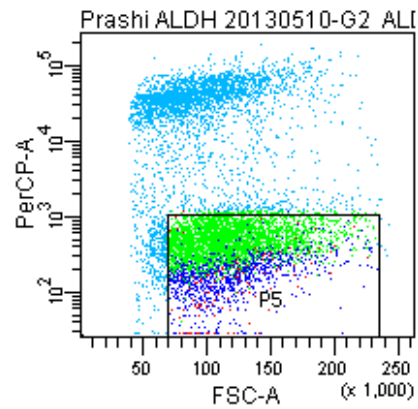

Tube: G2 ALDH

| Population | #Events | %Parent | %Total |
|------------|---------|---------|--------|
| All Events | 10,000  | ###     | 100.0  |
| Cells      | 8,976   | 89.8    | 89.8   |
| Singlets   | 8,287   | 92.3    | 82.9   |
| Singlets2  | 7,814   | 94.3    | 78.1   |
| P5         | 4,448   | 56.9    | 44.5   |
| P1         | 149     | 3.3     | 1.5    |
| P2         | 2,899   | 65.2    | 29.0   |
| P3         | 3,692   | 83.0    | 36.9   |
| P4         | 3,645   | 81.9    | 36.4   |

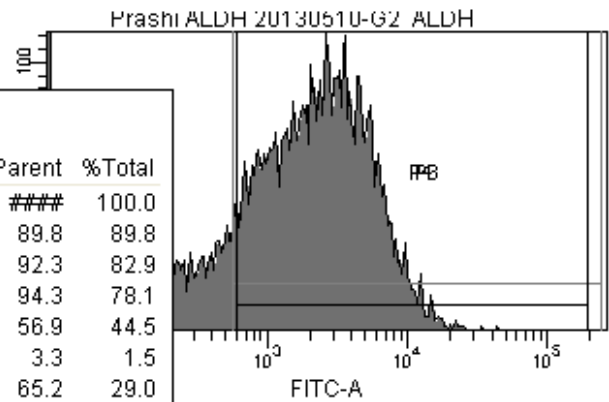

Supplement: MOESM1 [file 9767416]
