# Supplementary material for: Detection of ALDH1 activity in rabbit hepatic VX2 tumors and isolation of ALDH1 positive cancer stem cells
Source: Springer Nature journal article supplement (doi:10.1186/s12967-016-0785-0), 2016-02-12
Supplement: MOESM2 [file 9767416]

# FACSDiva Version 6.1.3

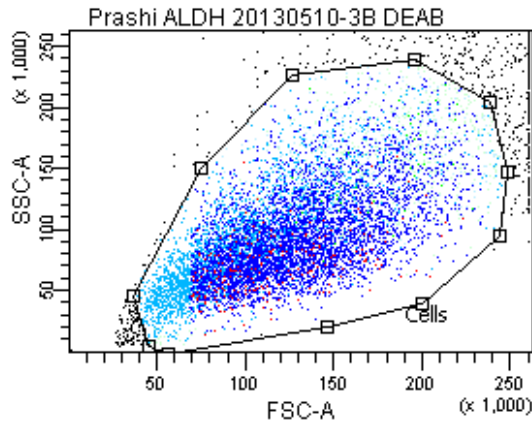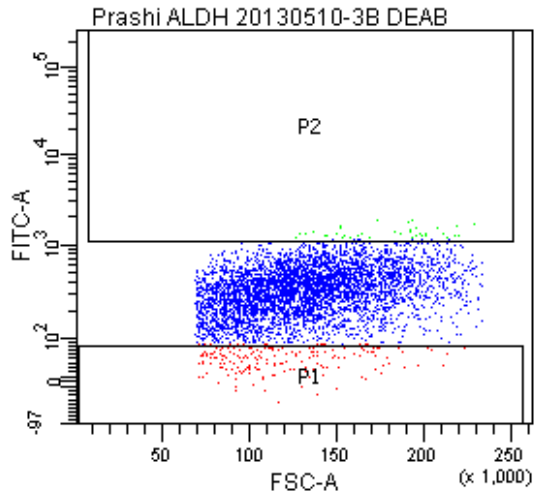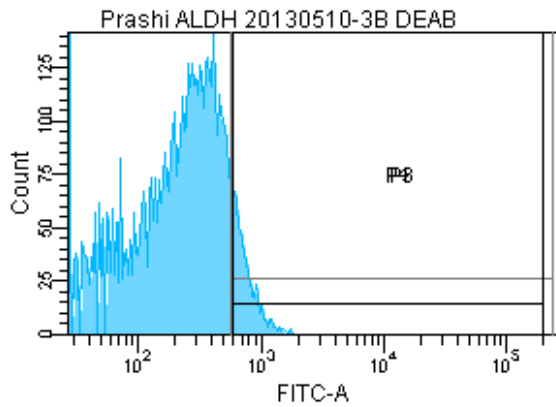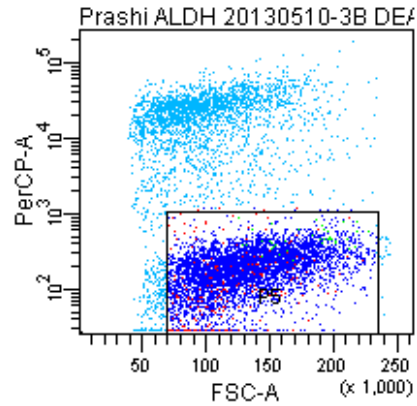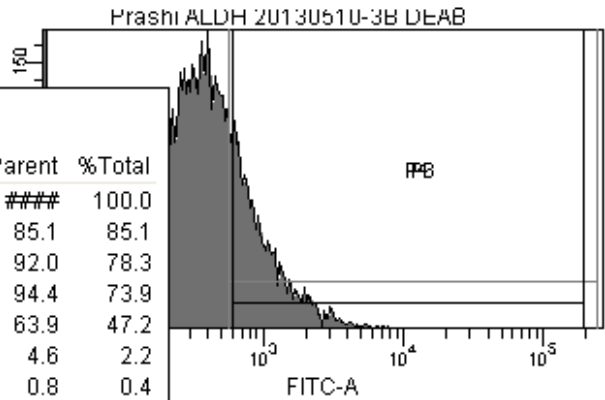

Tube: 3B DEAB

| Population | #Events | %Parent | %Total |
|------------|---------|---------|--------|
| All Events | 10,000  | ###     | 100.0  |
| Cells      | 8,508   | 85.1    | 85.1   |
| Singlets   | 7,827   | 92.0    | 78.3   |
| Singlets2  | 7,388   | 94.4    | 73.9   |
| P5         | 4,718   | 63.9    | 47.2   |
| P1         | 218     | 4.6     | 2.2    |
| P2         | 38      | 0.8     | 0.4    |
| P3         | 630     | 13.4    | 6.3    |
| P4         | 558     | 11.8    | 5.6    |
